1 ***Salmonella* Typhimurium infection drives NK cell loss and conversion to**  
2 **ILC1-like cells, and CIS inhibition enhances antibacterial immunity**

3

4 **Timothy R. McCulloch<sup>1</sup>, Gustavo R. Rossi<sup>1</sup>, Timothy J. Wells<sup>1,2</sup>, Fernando Souza-**  
5 **Fonseca-Guimaraes<sup>1</sup>**

6 <sup>1</sup> University of Queensland Diamantina Institute, The University of Queensland,  
7 Woolloongabba, QLD 4102, Australia.

8 <sup>2</sup> Australian Infectious Diseases Research Centre, University of Queensland, Brisbane 4072,  
9 QLD, Australia

10 **Correspondence:**

11 Fernando S. F. Guimaraes

12 f.guimaraes@uq.edu.au

13 **Abstract**

14 Immunotherapy has revolutionized cancer therapy by reactivating tumor-resident  
15 cytotoxic lymphocytes. More recently, immunotherapy has emerged to restore immunity  
16 against infectious agents, including bacterial infections. Immunotherapy primarily targets  
17 inhibitory pathways in tumor-resident T cells, however interest in other effector populations,  
18 such as natural killer (NK) cells, is growing. We have previously discovered that NK cell  
19 metabolism, proliferation, and activation can be neutralized through the TGF- $\beta$   
20 immunosuppressive pathway by inducing plasticity of NK cells and differentiation into ILC1-  
21 like subsets. NK cells are also regulated through cytokine-inducible SH2-containing protein  
22 (CIS), which is induced by IL-15 and is a potent intracellular checkpoint suppressing NK cell  
23 survival and function. Targeting these two distinct pathways to restore NK cell function has  
24 shown promise in cancer models, but their application in bacterial infection remains unknown.  
25 Here, we investigate whether enhancement of NK cell function can improve anti-bacterial  
26 immunity, using *Salmonella* Typhimurium as a model. We identified conversion of NK cells  
27 to ILC1-like for the first time in the context of bacterial infection, however TGF- $\beta$  signaling  
28 was curiously redundant in this plasticity. Future work should focus on identifying drivers of  
29 ILC1 plasticity and its functional implication in bacterial infection models. We further describe  
30 that CIS-deficient mice displayed enhanced pro-inflammatory function and dramatically  
31 enhanced anti-infection immunity. Inhibition of CIS may present as a viable therapeutic option  
32 to enhance immunity towards bacterial infection.

33

34 **Keywords:** CIS, TGF- $\beta$  signaling, anti-bacterial responses, natural killer cells, innate  
35 lymphoid cell 1, cellular plasticity.

36

## 37 **Introduction**

38 Natural killer (NK) cells are cytotoxic innate lymphocytes which have well described  
39 roles in the host defense against viral pathogens and cancer. Yet their ability to contribute to  
40 immunity in many bacterial infections, including *Salmonella enterica* serovar Typhimurium,  
41 remains unclear. NK cells have the potential to promote anti-*Salmonella* immunity through  
42 direct killing of infected cells and activation of infected cells through proinflammatory  
43 cytokine production, namely interferon (IFN)- $\gamma$ . Previous studies in a murine model of *S.*  
44 Typhimurium infection have indicated that NK cells can contribute to protective IFN- $\gamma$  and  
45 disease clearance in immunocompromised mice, but are otherwise dispensable when CD4<sup>+</sup> T  
46 cells are present (Kupz et al., 2013). The idea of NK cell redundancy when adaptive  
47 lymphocytes are present has also been suggested in human disease (Vély et al., 2016). This  
48 suggests that the standard depletion model using anti-NK1.1 or anti-asialo-GM1 antibodies is  
49 insufficient to gauge the full potential of NK cells to promote antibacterial immunity in  
50 otherwise immunocompetent hosts. Depletion studies do not account for the impact of NK cell  
51 regulation during infection through the action of immunoregulatory cytokines such as  
52 interleukin (IL)-10 and transforming growth factor (TGF)- $\beta$ , NK cell lymphopenia, and  
53 inhibitory immune checkpoints. Targeting these mechanisms of regulation may allow NK cells  
54 to participate in immunity where they may otherwise have been incapable.

55 Blockade of immunoregulatory molecules through immunotherapy have revolutionized  
56 cancer therapy. The classical targets are surface immune checkpoint molecules, such as  
57 programmed cell death protein-1 (PD-1), and cytotoxic T-lymphocyte-associated protein-4  
58 (CTLA-4), which bind to their ligand on infected or tumor cells to ablate lymphocyte function.  
59 Blockade of these receptors can reverse this immune suppression and restore lymphocyte  
60 function (Robert, 2020). However, interest is rising in targeting other types of molecules,  
61 including regulatory cytokines and intracellular immune checkpoints. TGF- $\beta$  is a pleiotropic

62 cytokine of the TGF superfamily which has potent regulatory effects on NK cells by repressing  
63 mammalian target of rapamycin (mTOR) (Viel et al., 2016) and converting them to an innate  
64 lymphoid cell (ILC)1-like phenotype (Gao et al., 2017). Also of particular importance in NK  
65 cells is cytokine-inducible SH2-containing protein (CIS), which acts as a negative regulator of  
66 IL-15 signaling to limit NK cell proliferation and pro-inflammatory function (Delconte et al.,  
67 2016). Inhibition of these two pathways in bacterial infection may restore the function of NK  
68 cells, allowing them to contribute towards anti-bacterial immunity.

69 In the face of antimicrobial resistance, which is leading to infections that are increasingly  
70 difficult to treat, immunotherapy is arising as a potential alternative or conjunction to  
71 traditional antimicrobial therapy (McCulloch et al., 2021). In this study, we use a ‘gain of  
72 function’ model to investigate whether NK cell function could be enhanced or restored during  
73 infection to boost anti-bacterial immunity. Our group and others have focused on the  
74 improvement of NK cell function through the deletion of receptors for immunoregulatory  
75 molecules TGF- $\beta$  (Gao et al., 2017; Rautela et al., 2019; Viel et al., 2016) or CIS (Delconte et  
76 al., 2016). Here, we investigate whether simultaneous immune checkpoint suppression of TGF-  
77  $\beta$  and CIS signaling in a new transgenic mouse model could act synergistically to increase the  
78 magnitude of NK cell effector function against *Salmonella* infection.

79

## 80 **Results**

### 81 **NK cells are depleted and converted to ILC1-like cells during *S. Typhimurium* infection**

82 To investigate NK cells during *S. Typhimurium* infection, mice were infected i.p. with  
83 the attenuated mutant, SL32621. This model replicates the chronic, invasive infection seen in  
84 human disease. At day 10 post infection, spleens and livers were removed to observe  
85 phenotypic changes in immune cells. Of note, we observed a phenotypic switch from  
86 conventional NK (cNK) cells to ILC1-like cells, as determined by upregulation of tissue  
87 residence marker CD49a. This occurred in both the spleen (**Fig. 1a,b**) and liver (**Fig. 1c,d**) of  
88 infected mice. Furthermore, we also observed significant NK cell lymphopenia in the blood  
89 (**Fig. 1e**) and spleen (**Fig. 1f**) of infected mice compared to uninfected. NK cell lymphopenia  
90 was not seen in the liver of infected mice, where normal NK numbers were persevered (**Fig.**  
91 **1g**). Collectively, this data indicates that NK cells are considerably affected during *S.*  
92 *Typhimurium* infection, characterized by conversion to ILC1-like cells and organ specific  
93 depletion.

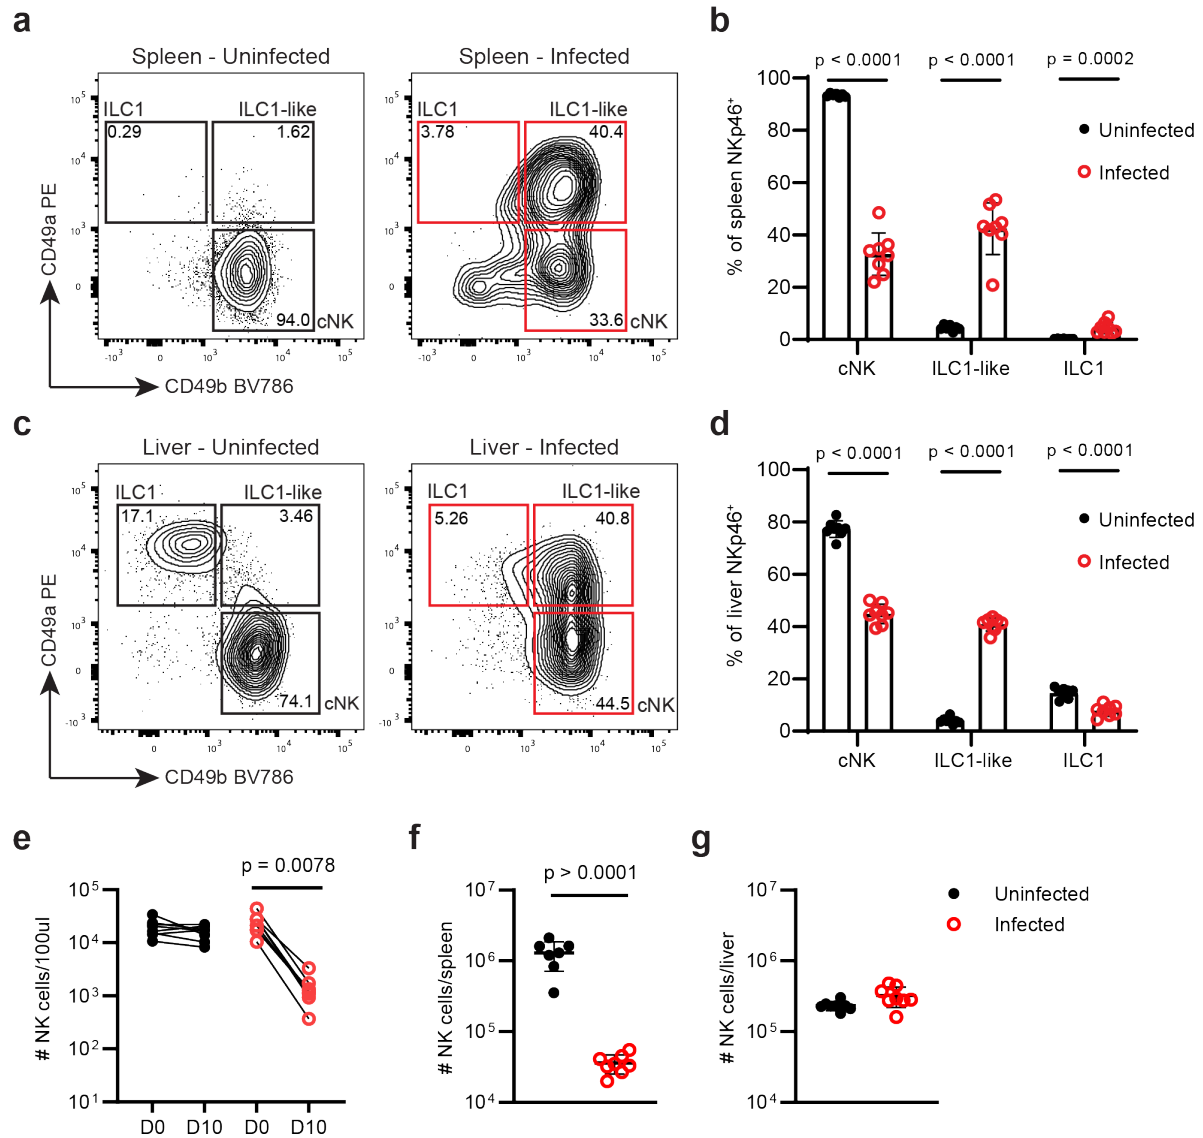

94

95 **Figure 1: NK cells are depleted and converted to ILC1-like cells during *S. Typhimurium***  
 96 **infection.** Group 1 ILCs were analysed by flow cytometry 10 days after infection with *S.*  
 97 *Typhimurium*. Representative flow cytometry plots showing CD49a and CD49b expression  
 98 from one uninfected and one infected mouse spleen (a) and liver (c) are shown, along with  
 99 graphs displaying relative percentages of cNK, ILC1-like, and ILC1 within the spleen (b) and  
 100 liver (d) (n = 8). Total numbers of NK cells per 100ul of blood prior to infection and at day 10  
 101 post infection were determined by flow cytometry (e). At 10 days post infection, numbers of  
 102 NK cells in the spleen (f) and liver (g) were determined by flow cytometry. Data from one  
 103 experiment. Each symbol represents an individual mouse, graphs show mean value ± SEM.  
 104 Statistical p values determined by Mann-Whitney *t* test, or Wilcoxon rank test for (e). No p  
 105 value indicates no significant difference.

106

107

108 **Deletion of *CISH*, but not conditional deletion of *TgfbRII*, results in enhanced anti-**  
109 **bacterial immunity**

110 Conversion of NK cells to ILC1-like cells has previously been shown to contribute to  
111 immune evasion of tumors (Gao et al., 2017), where the conversion is driven primarily by TGF-  
112  $\beta$  (Gao et al., 2017; Viel et al., 2016). Thus, we predicted that conversion to ILC1-like cells in  
113 our infection model could be dampening the ability of NK cells to contribute to bacterial  
114 clearance. To address this, we infected mice with conditional deletion of the TGF- $\beta$  receptor II  
115 specifically within NK cells (*TgfbRII<sup>FL</sup>*). NK cell mediated bacterial clearance could be further  
116 impacted by the observed lymphopenia. Deletion of the *Cish* gene, which encodes for the  
117 intracellular checkpoint molecule CIS, has been reported to enhance NK cell function and  
118 proliferation (Delconte et al., 2016, 2020). While deletion of CIS does not lead to increased  
119 NK cell accumulation in the steady state (Delconte et al., 2016), we predicted its deletion could  
120 enhance proliferation to help maintain NK cell numbers during infection. Therefore, we also  
121 infected CIS deficient mice (*Cish<sup>KO</sup>*). We also infected mice with CIS deficiency and  
122 conditional deletion of TGF- $\beta$  signaling within NK cells (*TgfbRII<sup>FL</sup>/Cish<sup>KO</sup>*) to determine if  
123 these could have a synergistic effect in improving anti-bacterial immunity. Surprisingly,  
124 *TgfbRII<sup>FL</sup>* mice did not show a reduced bacterial load in either the spleen (**Fig. 2a**) or the liver  
125 (**Fig. 2b**) compared to wild-type controls. Conversely, *Cish<sup>KO</sup>* mice exhibited a significant  
126 reduction in bacterial burden in both organs (**Fig. 2a,b**). The combination of both NK cell gain  
127 of function genes did not synergize further reduce bacterial burdens (**Fig. 2a,b**). To investigate  
128 whether the enhanced immunity in *Cish<sup>KO</sup>* mice was NK cell dependent, *Cish<sup>KO</sup>* mice were  
129 treated with  $\alpha$ NK1.1 to deplete NK cells. No differences were observed in the spleen (**Figure,**  
130 **2c**). In the liver, while *Cish<sup>KO</sup>* was able to significantly reduce bacterial burdens, *Cish<sup>KO</sup>* with  
131 NK cell depletion did not significantly differ from wild-type or *Cish<sup>KO</sup>* alone (**Figure, 2d**).  
132 Further, IL-6 was the only cytokine significantly increased in the plasma of *Cish<sup>KO</sup>* mice at day

133 two compared to wild-type controls (**Supplementary Figure 1**), suggesting *Cish* deletion may  
134 primarily act through myeloid cells in this case. No significant increases in cytokine levels  
135 were observed at day nine post infection (**Supplementary Figure 2**). Thus, we found no  
136 evidence that the reductions in bacterial burdens observed in the livers of *Cish*<sup>KO</sup> mice was due  
137 to enhancement of NK cell function.

138

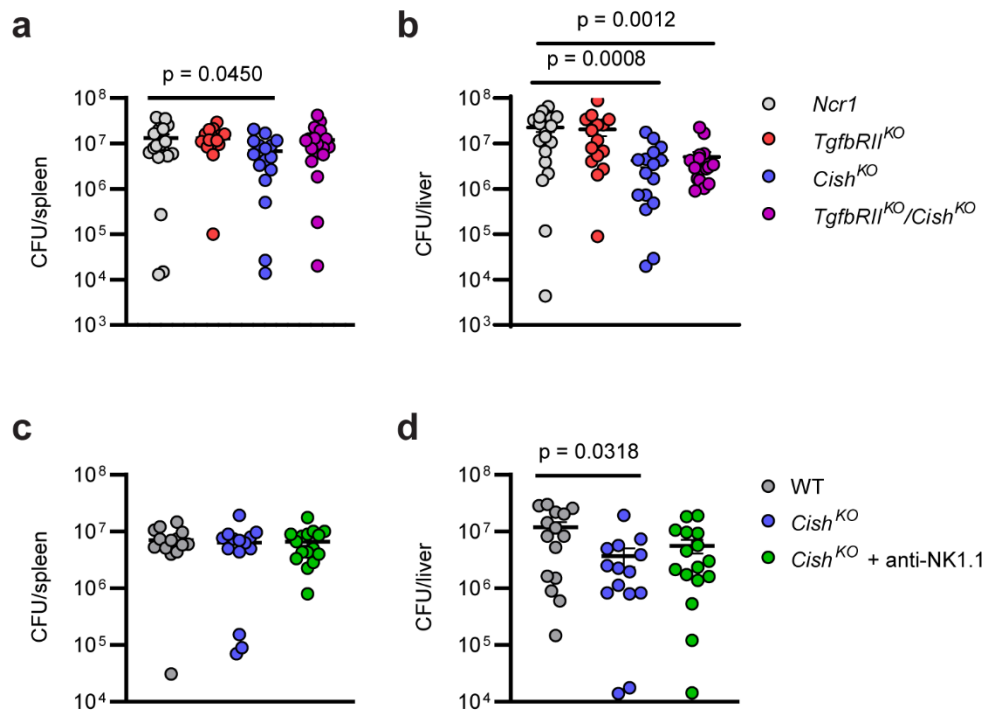

139

140 **Figure 2: Deletion of *CISH*, but not conditional deletion of TGF- $\beta$  signalling, results in**  
141 **reduced bacterial burdens.** *Ncr1Cre*, *TgfbRII<sup>FL</sup>*, *Cish<sup>KO</sup>*, and *TgfbRII<sup>FL</sup>/Cish<sup>KO</sup>* mice were  
142 infected with *S. Typhimurium*. At day 10 post infection, spleens and livers were collected to  
143 quantify bacterial burden. Colony forming units (CFU) per spleen (a) and liver (b) are shown  
144 (n = 15-19). Data from two independent experiments. C57BL/6 and *Cish<sup>KO</sup>* were infected while  
145 simultaneously treated with either anti-NK1.1 depletion antibody, or isotype control. Colony  
146 forming units per spleen (c) and liver (d) are shown (n = 14-16). Data from two independent  
147 experiments. Each symbol represents an individual mouse, graphs show mean value  $\pm$  SEM.  
148 Statistical p values determined by Mann-Whitney *t* test, where no p value indicates no  
149 significant difference.

150

151



152 **Conversion of NK to ILC1-like cells is not TGF- $\beta$  dependent in *S. Typhimurium* infection**

153 We found that NK cells are converted to ILC1-like cells during *S. Typhimurium*  
154 infection (**Fig 1a-d**), a plasticity which has been previously shown to be dependent primarily  
155 on TGF- $\beta$  (Gao et al., 2017). However, despite this conversion being well characterized in the  
156 literature to contribute to immune evasion during cancer (Gao et al., 2017; Hawke et al., 2020;  
157 Viel et al., 2016), conditional deletion of TGF- $\beta$  within NK cells did not appear to improve  
158 anti-bacterial immunity. We postulated this could be due to one of two reasons, either ILC1-  
159 like conversion does not restrict NK cell mediated immunity in our model, or TGF- $\beta$  is not the  
160 sole driver of this conversion. To investigate this, the NK/ILC1-like status was investigated in  
161 *TgfbRII<sup>FL</sup>* mice infected with *S. Typhimurium* by flow cytometry. Surprisingly, conditional  
162 deletion of TGF- $\beta$  signaling within NK cells did not prevent conversion to ILC1-like cells in  
163 either the spleen (**Fig. 3a,b**) or liver (**Fig. 3c,d**) of infected mice. We also targeted TGF- $\beta$   
164 signaling therapeutically using the TGF- $\beta$  receptor 1 kinase inhibitor galunisertib in infected  
165 mice, however we observed no changes to bacterial burdens (**Supplemental Fig. 3a,b**), weight  
166 change (**Supplemental Fig. 3c**), or NK cell to ILC1-like conversion (**Supplemental Fig. 3d,e**)  
167 in galunisertib treated mice compared to untreated controls. Further, neither conditional  
168 deletion of *TgfbRII*, deletion of *Cish*, or a combination were able to prevent NK cell  
169 lymphopenia observed in the blood and spleen of infected mice (data not shown). Taken  
170 together, this data suggests that canonical TGF- $\beta$  / TGF-bRII signaling is redundant in driving  
171 NK cell to ILC1-like conversion during *S. Typhimurium* infection. This may explain why no  
172 reduction in bacterial burdens were observed in *TgfbRII<sup>FL</sup>* mice or mice treated with the TGF-  
173 bRI inhibitor galunisertib, although whether the conversion limits NK-mediated immunity  
174 during bacterial infection remains unclear.

175

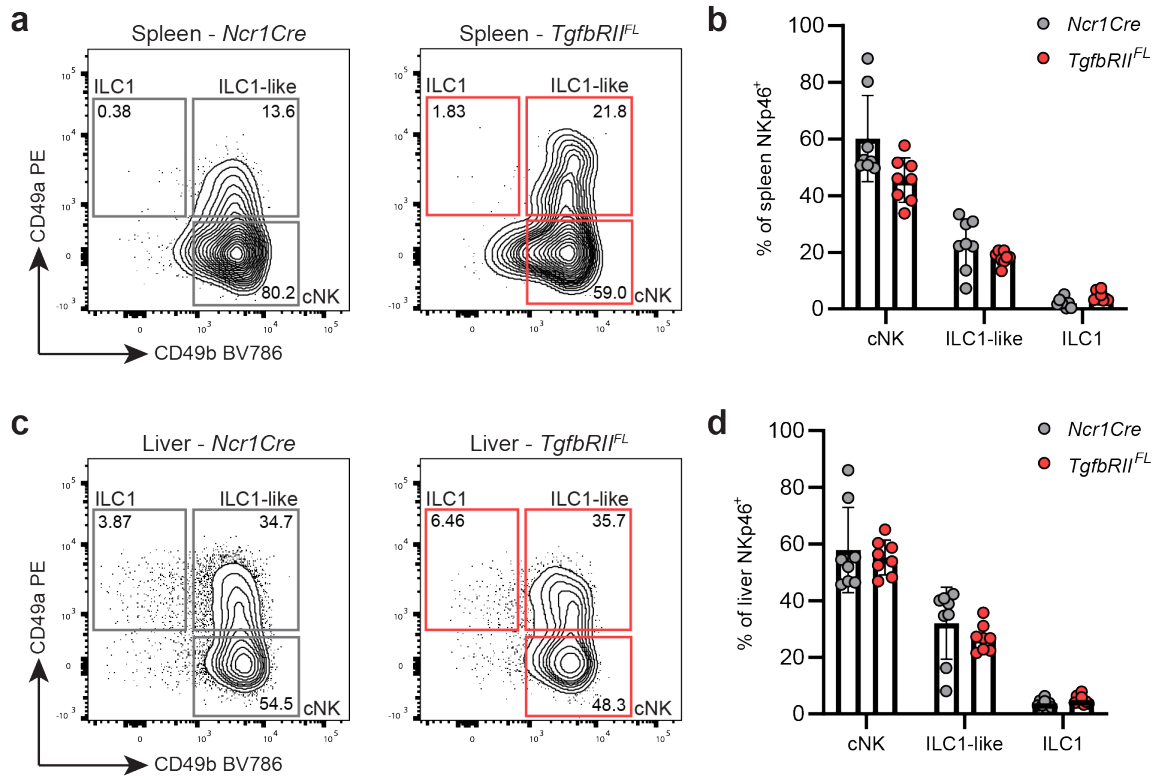

176

177

**Figure 3: TGF- $\beta$  signalling is redundant in NK to ILC1-like plasticity in *S. Typhimurium* infection.** *TgfbRIIFL* mice, which lack the TGF- $\beta$  receptor specifically within NK cells, as well as *Ncr1Cre* controls, were infected with *S. Typhimurium*. At day 10 post infection, Group 1 ILCs were analysed by flow cytometry. Representative flow cytometry plots showing CD49a and CD49b expression from one *Ncr1Cre* and one *TgfbRIIFL* mouse spleen (a) and liver (c) are shown, along with graphs displaying relative percentages of cNK, ILC1-like, and ILC1 within the spleen (b) and liver (d) (n = 8). Data from one experiment. Each symbol represents an individual mouse, graphs show mean value  $\pm$  SEM. Statistical p values determined by Mann-Whitney *t* test, where no p value indicates no significant difference.

186

187

## 188 Discussion

189 The purpose of this study was to gain a better understanding of how NK cells are  
190 regulated during bacterial infection. NK cells are increasingly being recognized as a promising  
191 immunotherapy target in settings of cancer (Souza-Fonseca-Guimaraes et al., 2019), however  
192 their efficacy as a target during acute or chronic bacterial infection is unknown.  
193 Immunotherapy for treating bacterial infections, particularly in the case of antibiotic resistance,  
194 is an emerging field (McCulloch et al., 2021), for which NK-mediated immunotherapy may  
195 also show potential. Identification of specific regulatory molecules and checkpoints acting on  
196 NK cells during bacterial infection could uncover novel immunotherapy targets to enhance  
197 NK-mediated bacterial immunity.

198 Our finding that NK cells were converted to ILC1-like cells during *S. Typhimurium*  
199 was not unexpected. This conversion has previously been observed in other diseases including  
200 cancer (Gao et al., 2017) and parasitic infection (Park et al., 2019). Further, *Salmonella*  
201 subspecies are known to actively drive macrophage polarization towards an anti-inflammatory  
202 (or M2-like) phenotype (Stapels et al., 2018), promoting the production of regulatory cytokines  
203 such as IL-10 and TGF- $\beta$  (Jaslow et al., 2018). However, by using transgenic mice and  
204 therapeutic inhibition, we found that conversion to ILC1-like cells was likely not TGF- $\beta$   
205 dependent in our model. The TGF- $\beta$  superfamily is a large group of over 33 regulatory proteins  
206 which have both distinct and overlapping functions (Morikawa et al., 2016). Therefore it is  
207 reasonable to assume that other members of the TGF- $\beta$  superfamily could also drive this  
208 conversion, which has already been observed in the case of Activin A (Rautela et al., 2019).  
209 Our findings using the therapeutic inhibitor galunisertib, which targets the TGF- $\beta$  receptor 1  
210 kinase, may also be hindered by inconsistencies in the literature on the appropriate dosing of  
211 this drug in mouse models. Dosing regimens published in murine studies range from 10 mg/kg

212 every second day by i.p. injection (Rautela et al., 2019) to 150 mg/kg twice daily by oral gavage  
213 (Gunderson et al., 2020). Whether underdosing was a defining factor in our results is unknown.  
214 The driving factor, or factors, behind NK to ILC1-like conversion would need to be identified  
215 before definitively determining whether this conversion limits anti-bacterial immunity.

216 This study also found that deletion of CIS improved control of *S. Typhimurium*  
217 infection. CIS is a suppressor of cytokine signaling (SOCS) protein which functions as a  
218 negative regulator of cytokine signaling. In the case of NK cells, IL-15 signaling leads to  
219 phosphorylation of Janus kinase (JAK)1 and 3, and subsequent recruitment and  
220 phosphorylation of STAT5. This allows STAT5 to then translocate to the nucleus to transcribe  
221 variety of genes associated with NK cell function and survival (Ma et al., 2006). Also  
222 transcribed is *Cish*, encoding CIS, which binds to JAK1 and JAK3, targeting them for  
223 proteasomal degradation. In this way, CIS acts as a negative feedback loop to limit IL-15  
224 signaling and NK cell activation (Delconte et al., 2016). However, STAT5 signaling is also  
225 active in other cell types in response to signaling by cytokines other than IL-15, including IL-  
226 2 and GM-CSF. CIS also inhibits T cell receptor signaling (Palmer et al., 2015). Thus, CIS has  
227 also been shown to regulate additional immune cells including ILC2s (Kotas et al., 2021),  
228 CD4<sup>+</sup> and CD8<sup>+</sup> T cells (Palmer et al., 2015; Yang et al., 2013), neutrophils (Louis et al., 2020),  
229 and macrophages (Carow et al., 2017; E. et al., 2021). Considering this was a whole mouse  
230 knockout of CIS, we cannot be sure of which cell type, or combinations of cell types, benefited  
231 from CIS deletion to promote anti-bacterial immunity. We found no evidence to confirm our  
232 initial hypothesis that CIS deletion acted through NK cell enhancement.

233 Curiously, our results may be somewhat conflicting with other studies. Despite being a  
234 negative regulator of immune function, CIS has previously been shown to mediate early control  
235 of tuberculosis infection in a mouse model (Carow et al., 2017). In humans, single nucleotide

236 polymorphisms (SNPs) in *Cish* have been associated with increased susceptibility to  
237 tuberculosis, malaria, and bacteremia (Khor et al., 2010). However, the functional implications  
238 of these SNPs on immune response were not established in the study. These previous results  
239 may be explained by multiple observations in which excessive inflammation worsens  
240 infectious disease. This can be epitomized by the curious case of anti-PD1 therapy in  
241 tuberculosis, which exacerbates disease severity and reactivates latent infection (Barber et al.,  
242 2019; Kauffman et al., 2021). Thus, in the case of tuberculosis, immune enhancement does not  
243 always lead to greater immunity. That we have found CIS deletion enhances anti-*Salmonella*  
244 immunity, where others have found it impedes anti-tuberculosis immunity, may be explained  
245 by underlying differences in the physiology and pathology of these two pathogens. These  
246 differences must be rigorously examined if any pharmacological targeting of CIS signaling is  
247 to be trialed to treat bacterial infections.

248         In summary, we have been able to expand the current knowledge of ILC plasticity to  
249 show for the first-time evidence of conversion of NK cells to ILC1-like cells during bacterial  
250 infection. However, the precise driver of conversion as well as the functional relevance this  
251 plasticity has on infection outcome remains elusive. Here, we have also shown that CIS is a  
252 potent immune checkpoint in anti-*Salmonella* immunity. However, expression of CIS is also  
253 conserved across other immune cell types such as myeloid cells, and thus the exact cell type or  
254 mechanism where CIS acts on to restrict bacterial clearance could not be addressed in this  
255 current study. Future work is warranted to elucidate how CIS inhibition enacts its effects, and  
256 whether pharmacological inhibition of this molecule could enhance anti-bacterial immunity.

257

## 258 **Methods**

### 259 **Mouse models**

260 *Ncr1<sup>cre/wt</sup>TgfbRII<sup>fl/fl</sup>* mice were used as conditional TgfbRII-deficiency specific to NK  
261 cells, obtained by crossing as previous described by our group (Gao et al., 2017). *Cish<sup>-/-</sup>* were  
262 maintained on a C57BL/6 background (Delconte et al., 2016). To obtain a double deficient  
263 mouse model, *Ncr1<sup>cre/wt</sup>TgfbRII<sup>fl/fl</sup>* were back crossed with *Cish<sup>-/-</sup>* to obtain a *Cish<sup>-/-</sup>*  
264 *Ncr1<sup>cre/wt</sup>TgfbRII<sup>fl/fl</sup>* mice strain. *Ncr1<sup>cre/wt</sup>* mice were considered wild-type controls for some  
265 experiments. *Ncr1<sup>cre/cre</sup>Mcl1<sup>fl/fl</sup>* mice were used as NK cell deficient controls (Sathe et al.,  
266 2014). All experiments were performed using cells from age/sex matched cohort of mice (age  
267 range 8-12 weeks). Cohort sizes are described in each figure legends, where power calculations  
268 were used to estimated sample size needed to achieve statistical significance at a 50% change  
269 in bacterial burden or immune parameters with a power of 0.80 and Type I error (alpha) of  
270 0.05. For infection studies, mice with no detectable bacterial load at the end of the experiment  
271 were considered to have not taken up infection and were excluded from further analysis. All  
272 experiments were approved by the University of Queensland's Animal Ethics Committees.

### 273 **Bacterial strains and *in vivo* infections**

274 Mice were infected with an attenuated *aroA* mutant strain of *Salmonella enterica*  
275 serovar Typhimurium, SL3261 (Hoiseth & Stocker, 1981). For *in vivo* infection, bacteria were  
276 grown at 37°C with shaking in Lysogeny broth (LB) for 16 to 18 hours. OD<sub>600</sub> was used to  
277 enumerate bacteria, before being diluted to the appropriate concentration in PBS. Mice were  
278 infected by intraperitoneal (i.p) injection with 5 x 10<sup>6</sup> colony forming units (CFU) of SL3261  
279 in 200µl and sacrificed at the described times post-infection. The TGF-β receptor I inhibitor  
280 galunisertib (LY2157299, SelleckChem, Houston TX) was given at a dose of 10mg/kg by i.p  
281 infection, as described previously (Rautela et al., 2019). To deplete NK cells, appropriate mice

282 were treated with 100µg of anti-NK1.1 antibody (PK136, BioXCell, Lebanon NH) or isotype  
283 control (2AE, BioXCell) on days -3, 0, 3, and 8 relative to infection.

284

## 285 **Murine tissue collection**

286 Blood samples were taken from mice by retro-orbital bleeds into EDTA-coated tubes.  
287 Tubes were centrifuged at 1,500 g for 15 minutes, and plasma removed from cell pellet. Plasma  
288 samples were stored at -20°C until analysis. At the experimental endpoint, mice were  
289 euthanized by CO<sub>2</sub> asphyxiation. Spleens and livers were dissected and held in PBS until  
290 processing. Bacterial counts were enumerated from organs by homogenizing samples in 0.1%  
291 Triton-X (Sigma-Aldrich, Burlington MA) in PBS before serially diluting in PBS and plating  
292 on LB agar plates.

293

## 294 **Flow cytometry**

295 Spleens and livers were passed through a 70µm or 100µm cell strainer, respectively, in  
296 cold fluorescence-activated cell sorting (FACS) buffer (PBS containing 2% fetal bovine serum  
297 and 2mM EDTA). Leukocytes were enriched using 37.5% Percoll solution (GE Healthcare,  
298 Uppsala, Sweden)) and red blood cells lysed with Ammonium-Chloride-Potassium (ACK)  
299 lysis buffer (Biolgend, San Diego CA). Dead cells were stained with Fixable Viability Stain  
300 440UV (1:1000 in PBS, Becton Dickinson, Franklin Lakes NJ) for 15 minutes at room  
301 temperature. Fc receptors were blocked by incubation for 15 minutes in Fc Blocking Reagent  
302 (1:100 in FACS buffer, Miltenyi Biotec, Bergisch Gladbach, Germany). Single-cell  
303 suspensions were stained with the indicated fluorescent antibodies on ice for 45 minutes. For  
304 intracellular cytokine staining, cells were fixed and permeabilized using the  
305 FoxP3/Transcription Factor Staining Buffer Set (eBioscience, San Diego CA), then stained for

306 60 minutes with the indicated fluorescent antibodies. Antibodies targeting CD45 (30-F11),  
307 CD4 (GK1.5), CD3 (145-2C11), CD8a (53-6.7), TIGIT (1G9), CD69 (H1.2F3), CD314 (CX5),  
308 CD223 (C9B7W), CD49b (HMa2), CD11b (M1/70), CD44 (IM7), PD-1 (J43), CD49a  
309 (HA31/8) were purchased from Becton Dickinson (Franklin Lakes NK). Antibodies targeting  
310 CD226 (TX42.1), CD335 (29A1.4), KLRG1 (2F1/KLRG1), CD19 (6D5), Ly6G (1A8), F4/80  
311 (BM8), and CD62L (MEL-14) were purchased from Biolegend. Antibodies targeting Tim-3  
312 (RMT3-23), Eomes (Dan11mag), and FoxP3 (FJK-16S) were purchased from eBioscience  
313 (San Diego CA).

314

### 315 **Measurement of cytokines**

316 IFN- $\gamma$  titers were determined from murine serum samples using a Mouse IFN- $\gamma$  ELISA  
317 set (Becton Dickinson) as per the manufacturer's instructions. Other cytokines were  
318 determined using Cytometric Bead Array (Becton Dickinson) as per the manufacturer's  
319 instructions.

320

### 321 **Statistics**

322 Statistical analysis was performed using GraphPad Prism Software v9 (GraphPad  
323 Software, San Diego CA). Statistical tests were performed for experiments as indicated in  
324 figure legends, and error bars represent SEM. Levels of statistical significance are expressed  
325 as p values.

326

327



328 **Conflict of Interest**

329 The authors declare that the research was conducted in the absence of any commercial or  
330 financial relationships that could be construed as a potential conflict of interest.

331 **Author Contributions**

332 T.R.M. and F.S.F.G. designed research and wrote the paper. T.R.M., and G.R.R., performed  
333 research and analysed data. T.J.W and F.S.F.G. supervised work.

334 **Funding**

335 This work is supported by project grants from the National Health and Medical Research  
336 Council (NHMRC) of Australia (#1140406 to F.S.F.G). F.S.F.G is funded by a UQ Diamantina  
337 Institute Laboratory Start-Up Package, a US Department of Defense – Breast Cancer Research  
338 Program – Breakthrough Award Level 1 (#BC200025), a ANZSA SRG Grant, and was  
339 supported by a grant (1158085) awarded through the Priority-driven Collaborative Cancer  
340 Research Scheme and co-funded by Cancer Australia and Cure Cancer.

341 **Acknowledgments**

342 We thank all the members of the Guimaraes and Wells laboratories; Prof. N. D. Huntington,  
343 Prof. G. T. Belz, Prof. S. Bell, Prof. M. Sweet, and Prof. A. Yoshimura for discussion,  
344 comments, and advice in this project; Prof. E. Vivier for providing the NKp46cre mice; and  
345 Profs. J. Ihle and E. Parganas for providing the CIS knockout mice. This research was carried  
346 out at the Translational Research Institute, Woolloongabba, QLD 4102, Australia. The  
347 Translational Research Institute is supported by grants from the Australian and Queensland  
348 Governments.

349

350

351 **References**

- 352 Barber, D. L., Sakai, S., Kudchadkar, R. R., Fling, S. P., Day, T. A., Vergara, J. A., Ashkin,  
353 D., Cheng, J. H., Lundgren, L. M., Raabe, V. N., Kraft, C. S., Nieva, J. J., Cheever, M.  
354 A., Nghiem, P. T., & Sharon, E. (2019). Tuberculosis following PD-1 blockade for cancer  
355 immunotherapy. *Science Translational Medicine*, *11*(475), 1–8.  
356 <https://doi.org/10.1126/scitranslmed.aat2702>
- 357 Carow, B., Gao, Y., Terán, G., Yang, X. O., Dong, C., Yoshimura, A., & Rottenberg, M. E.  
358 (2017). CISH controls bacterial burden early after infection with *Mycobacterium*  
359 *tuberculosis* in mice. *Tuberculosis*. <https://doi.org/10.1016/j.tube.2017.09.007>
- 360 Delconte, R. B., Guittard, G., Goh, W., Hediye-Zadeh, S., Hennessy, R. J., Rautela, J., Davis,  
361 M. J., Souza-Fonseca-Guimaraes, F., Nunès, J. A., & Huntington, N. D. (2020). NK Cell  
362 Priming From Endogenous Homeostatic Signals Is Modulated by CIS. *Frontiers in*  
363 *Immunology*, *11*. <https://doi.org/10.3389/fimmu.2020.00075>
- 364 Delconte, R. B., Kolesnik, T. B., Dagley, L. F., Rautela, J., Shi, W., Putz, E. M., Stannard, K.,  
365 Zhang, J. G., Teh, C., Firth, M., Ushiki, T., Andoniou, C. E., Degli-Esposti, M. A., Sharp,  
366 P. P., Sanvitale, C. E., Infusini, G., Liao, N. P. D., Linossi, E. M., Burns, C. J., ...  
367 Huntington, N. D. (2016). CIS is a potent checkpoint in NK cell-mediated tumor  
368 immunity. *Nature Immunology*. <https://doi.org/10.1038/ni.3470>
- 369 E., S. K., Neha, C., M., C. Y., A., M. B., K., C. V., A., C. J., Harinder, S., & A., G. R. (2021).  
370 CISH attenuates homeostatic cytokine signaling to promote lung-specific macrophage  
371 programming and function. *Science Signaling*, *14*(698), eabe5137.  
372 <https://doi.org/10.1126/scisignal.abe5137>
- 373 Gao, Y., Souza-Fonseca-Guimaraes, F., Bald, T., Ng, S. S., Young, A., Ngiow, S. F., Rautela,  
374 J., Straube, J., Waddell, N., Blake, S. J., Yan, J., Bartholin, L., Lee, J. S., Vivier, E.,  
375 Takeda, K., Messaoudene, M., Zitvogel, L., Teng, M. W. L., Belz, G. T., ... Smyth, M. J.  
376 (2017). Tumor immunoevasion by the conversion of effector NK cells into type 1 innate  
377 lymphoid cells. *Nature Immunology*, *18*(9), 1004–1015. <https://doi.org/10.1038/ni.3800>
- 378 Gunderson, A. J., Yamazaki, T., McCarty, K., Fox, N., Phillips, M., Alice, A., Blair, T.,  
379 Whiteford, M., O'Brien, D., Ahmad, R., Kiely, M. X., Hayman, A., Crocenzi, T., Gough,  
380 M. J., Crittenden, M. R., & Young, K. H. (2020). TGF $\beta$  suppresses CD8<sup>+</sup> T cell  
381 expression of CXCR3 and tumor trafficking. *Nature Communications*.

- 382 <https://doi.org/10.1038/s41467-020-15404-8>
- 383 Hawke, L. G., Mitchell, B. Z., & Ormiston, M. L. (2020). TGF- $\beta$  and IL-15 Synergize through  
384 MAPK Pathways to Drive the Conversion of Human NK Cells to an Innate Lymphoid  
385 Cell 1-like Phenotype. *The Journal of Immunology*, 204(12), 3171–3181.  
386 <https://doi.org/10.4049/jimmunol.1900866>
- 387 Hoiseth, S. K., & Stocker, B. A. D. (1981). Aromatic-dependent Salmonella typhimurium are  
388 non-virulent and effective as live vaccines. *Nature*. <https://doi.org/10.1038/291238a0>
- 389 Jaslow, S. L., Gibbs, K. D., Fricke, W. F., Wang, L., Pittman, K. J., Mammel, M. K., Thaden,  
390 J. T., Fowler, V. G., Hammer, G. E., Elfenbein, J. R., & Ko, D. C. (2018). Salmonella  
391 Activation of STAT3 Signaling by SarA Effector Promotes Intracellular Replication and  
392 Production of IL-10. *Cell Reports*, 23(12), 3525–3536.  
393 <https://doi.org/10.1016/j.celrep.2018.05.072>
- 394 Kauffman, K. D., Sakai, S., Lora, N. E., Namasivayam, S., Baker, P. J., Kamenyeva, O.,  
395 Foreman, T. W., Nelson, C. E., Oliveira-de-Souza, D., Vinhaes, C. L., Yaniv, Z.,  
396 Lindestam Arleham, C. S., Sette, A., Freeman, G. J., Moore, R., Sher, A., Mayer-Barber,  
397 K. D., Andrade, B. B., Kabat, J., ... Barber, D. L. (2021). PD-1 blockade exacerbates  
398 Mycobacterium tuberculosis infection in rhesus macaques. *Science Immunology*, 6(55),  
399 eabf3861. <https://doi.org/10.1126/sciimmunol.abf3861>
- 400 Khor, C. C., Vannberg, F. O., Chapman, S. J., Guo, H., Wong, S. H., Walley, A. J., Vukcevic,  
401 D., Rautanen, A., Mills, T. C., Chang, K.-C., Kam, K.-M., Crampin, A. C., Ngwira, B.,  
402 Leung, C.-C., Tam, C.-M., Chan, C.-Y., Sung, J. J. Y., Yew, W.-W., Toh, K.-Y., ... Hill,  
403 A. V. S. (2010). CISH and Susceptibility to Infectious Diseases. *New England Journal*  
404 *of Medicine*. <https://doi.org/10.1056/nejmoa0905606>
- 405 Kotas, M. E., Mroz, N. M., Koga, S., Liang, H. E., Schroeder, A. W., Ricardo-Gonzalez, R. R.,  
406 Schneider, C., & Locksley, R. M. (2021). CISH constrains the tuft-ILC2 circuit to set  
407 epithelial and immune tone. *Mucosal Immunology*. [https://doi.org/10.1038/s41385-021-](https://doi.org/10.1038/s41385-021-00430-6)  
408 [00430-6](https://doi.org/10.1038/s41385-021-00430-6)
- 409 Kupz, A., Scott, T. A., Belz, G. T., Andrews, D. M., Greyer, M., Lew, A. M., Brooks, A. G.,  
410 Smyth, M. J., Curtiss, R., Bedoui, S., & Strugnell, R. A. (2013). Contribution of Thy1+  
411 NK cells to protective IFN- $\gamma$  production during Salmonella Typhimurium infections.  
412 *Proceedings of the National Academy of Sciences of the United States of America*, 110(6),

- 413 2252–2257. <https://doi.org/10.1073/pnas.1222047110>
- 414 Louis, C., Souza-Fonseca-Guimaraes, F., Yang, Y., D’Silva, D., Kratina, T., Dagley, L.,  
415 Hediye-Zadeh, S., Rautela, J., Masters, S. L., Davis, M. J., Babon, J. J., Ciric, B., Vivier,  
416 E., Alexander, W. S., Huntington, N. D., & Wicks, I. P. (2020). NK cell-derived GM-  
417 CSF potentiates inflammatory arthritis and is negatively regulated by CIS. *Journal of*  
418 *Experimental Medicine*, 217(5). <https://doi.org/10.1084/jem.20191421>
- 419 Ma, A., Koka, R., & Burkett, P. (2006). Diverse functions of IL-2, IL-15, and IL-7 in lymphoid  
420 homeostasis. *Annual Review of Immunology*, 24, 657–679.  
421 <https://doi.org/10.1146/annurev.immunol.24.021605.090727>
- 422 McCulloch, T. R., Wells, T. J., & Souza-Fonseca-Guimaraes, F. (2021). Towards efficient  
423 immunotherapy for bacterial infection. In *Trends in Microbiology* (pp. 1–12).  
424 <https://doi.org/10.1016/j.tim.2021.05.005>
- 425 Morikawa, M., Derynck, R., & Miyazono, K. (2016). TGF- $\beta$  and the TGF- $\beta$  family: Context-  
426 dependent roles in cell and tissue physiology. In *Cold Spring Harbor Perspectives in*  
427 *Biology*. <https://doi.org/10.1101/cshperspect.a021873>
- 428 Palmer, D. C., Guittard, G. C., Franco, Z., Crompton, J. G., Eil, R. L., Patel, S. J., Ji, Y., Van  
429 Panhuys, N., Klebanoff, C. A., Sukumar, M., Clever, D., Chichura, A., Roychoudhuri, R.,  
430 Varma, R., Wang, E., Gattinoni, L., Marincola, F. M., Balagopalan, L., Samelson, L. E.,  
431 & Restifo, N. P. (2015). Cish actively silences TCR signaling in CD8+ T cells to maintain  
432 tumor tolerance. *Journal of Experimental Medicine*.  
433 <https://doi.org/10.1084/jem.20150304>
- 434 Park, E., Patel, S., Wang, Q., Andhey, P., Zaitsev, K., Porter, S., Hershey, M., Bern, M.,  
435 Plougastel-Douglas, B., Collins, P., Colonna, M., Murphy, K. M., Oltz, E., Artyomov, M.,  
436 Sibley, L. D., & Yokoyama, W. M. (2019). Toxoplasma gondii infection drives  
437 conversion of NK cells into ILC1-like cells. *ELife*. <https://doi.org/10.7554/eLife.47605>
- 438 Rautela, J., Dagley, L. F., De Oliveira, C. C., Schuster, I. S., Hediye-Zadeh, S., Delconte, R.  
439 B., Cursons, J., Hennessy, R., Hutchinson, D. S., Harrison, C., Kita, B., Vivier, E., Webb,  
440 A. I., Degli-Esposti, M. A., Davis, M. J., Huntington, N. D., & Souza-Fonseca-Guimaraes,  
441 F. (2019). Therapeutic blockade of activin-A improves NK cell function and antitumor  
442 immunity. *Science Signaling*, 12(596). <https://doi.org/10.1126/scisignal.aat7527>

- 443 Robert, C. (2020). A decade of immune-checkpoint inhibitors in cancer therapy. *Nature*  
444 *Communications*, 11(1), 3801. <https://doi.org/10.1038/s41467-020-17670-y>
- 445 Sathe, P., Delconte, R. B., Souza-Fonseca-Guimaraes, F., Seillet, C., Chopin, M., Vandenberg,  
446 C. J., Rankin, L. C., Mielke, L. A., Vikstrom, I., Kolesnik, T. B., Nicholson, S. E., Vivier,  
447 E., Smyth, M. J., Nutt, S. L., Glaser, S. P., Strasser, A., Belz, G. T., Carotta, S., &  
448 Huntington, N. D. (2014). Innate immunodeficiency following genetic ablation of Mcl1  
449 in natural killer cells. *Nature Communications*, 5, 4539.  
450 <https://doi.org/10.1038/ncomms5539>
- 451 Souza-Fonseca-Guimaraes, F., Cursons, J., & Huntington, N. D. (2019). The Emergence of  
452 Natural Killer Cells as a Major Target in Cancer Immunotherapy. In *Trends in*  
453 *Immunology*. <https://doi.org/10.1016/j.it.2018.12.003>
- 454 Stapels, D. A. C., Hill, P. W. S., Westermann, A. J., Fisher, R. A., Thurston, T. L., Saliba, A.  
455 E., Blommestein, I., Vogel, J., & Helaine, S. (2018). Salmonella persists undermine host  
456 immune defenses during antibiotic treatment. *Science*, 362(6419), 1156–1160.  
457 <https://doi.org/10.1126/science.aat7148>
- 458 Vély, F., Barlogis, V., Vallentin, B., Neven, B., Piperoglou, C., Ebbo, M., Perchet, T., Petit,  
459 M., Yessaad, N., Touzot, F., Bruneau, J., Mahlaoui, N., Zucchini, N., Farnarier, C.,  
460 Michel, G., Moshous, D., Blanche, S., Dujardin, A., Spits, H., ... Vivier, E. (2016).  
461 Evidence of innate lymphoid cell redundancy in humans. *Nature Immunology*, 17(11),  
462 1291–1299. <https://doi.org/10.1038/ni.3553>
- 463 Viel, S., Marcais, A., Guimaraes, F. S.-F., Loftus, R., Rabilloud, J., Grau, M., Degouve, S.,  
464 Djebali, S., Sanlaville, A., Charrier, E., Bienvenu, J., Marie, J. C., Caux, C., Marvel, J.,  
465 Town, L., Huntington, N. D., Bartholin, L., Finlay, D., Smyth, M. J., & Walzer, T. (2016).  
466 TGF-beta inhibits the activation and functions of NK cells by repressing the mTOR  
467 pathway. *Science Signaling*, 9(415), ra19. <https://doi.org/10.1126/scisignal.aad1884>
- 468 Yang, X. O., Zhang, H., Kim, B. S., Niu, X., Peng, J., Chen, Y., Kerketta, R., Lee, Y. H.,  
469 Chang, S. H., Corry, D. B., Wang, D., Watowich, S. S., & Dong, C. (2013). The signaling  
470 suppressor CIS controls proallergic T cell development and allergic airway inflammation.  
471 *Nature Immunology*. <https://doi.org/10.1038/ni.2633>
- 472

473 **Supplementary Material**

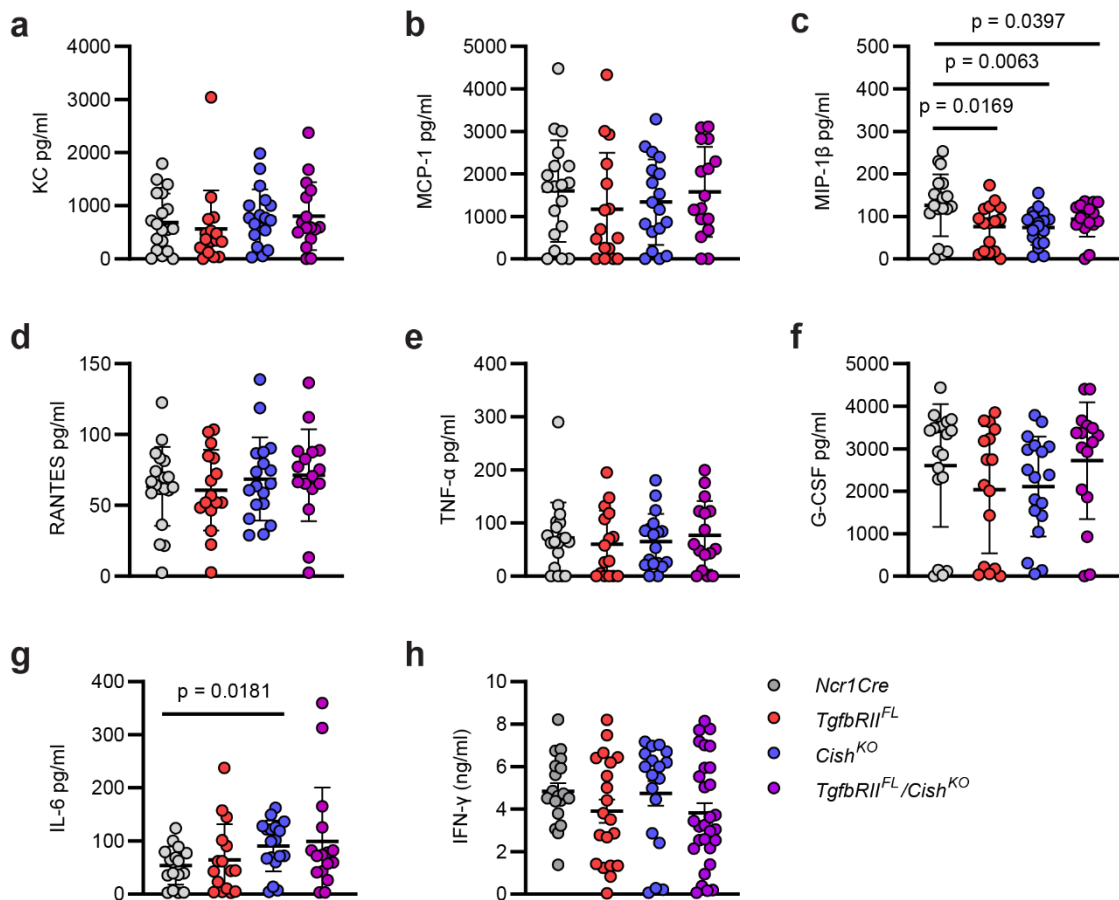

474  
475 **Figure 2 – figure supplement 1: Plasma cytokine levels in transgenic mice at day 2 post**  
476 **infection.** *Ncr1Cre*, *TgfbRII<sup>FL</sup>*, *Cish<sup>KO</sup>*, and *TgfbRII<sup>FL</sup>/Cish<sup>KO</sup>* mice were infected with *S.*  
477 *Typhimurium*. At day 2, plasma was taken to measure cytokine levels by CBA (a-g) or ELISA  
478 (h). Levels of KC (a), MCP-1 (b), MIP-1 $\beta$  (c), RANTES (d), TNF- $\alpha$  (e), G-CSF (f), IL-6 (g),  
479 and IFN- $\gamma$  (h) are shown. Data from two individual experiments. Each symbol represents an  
480 individual mouse, graphs show mean value  $\pm$  SEM. Statistical p values determined by Mann-  
481 Whitney *t* test, where no p value indicates no significant difference.  
482

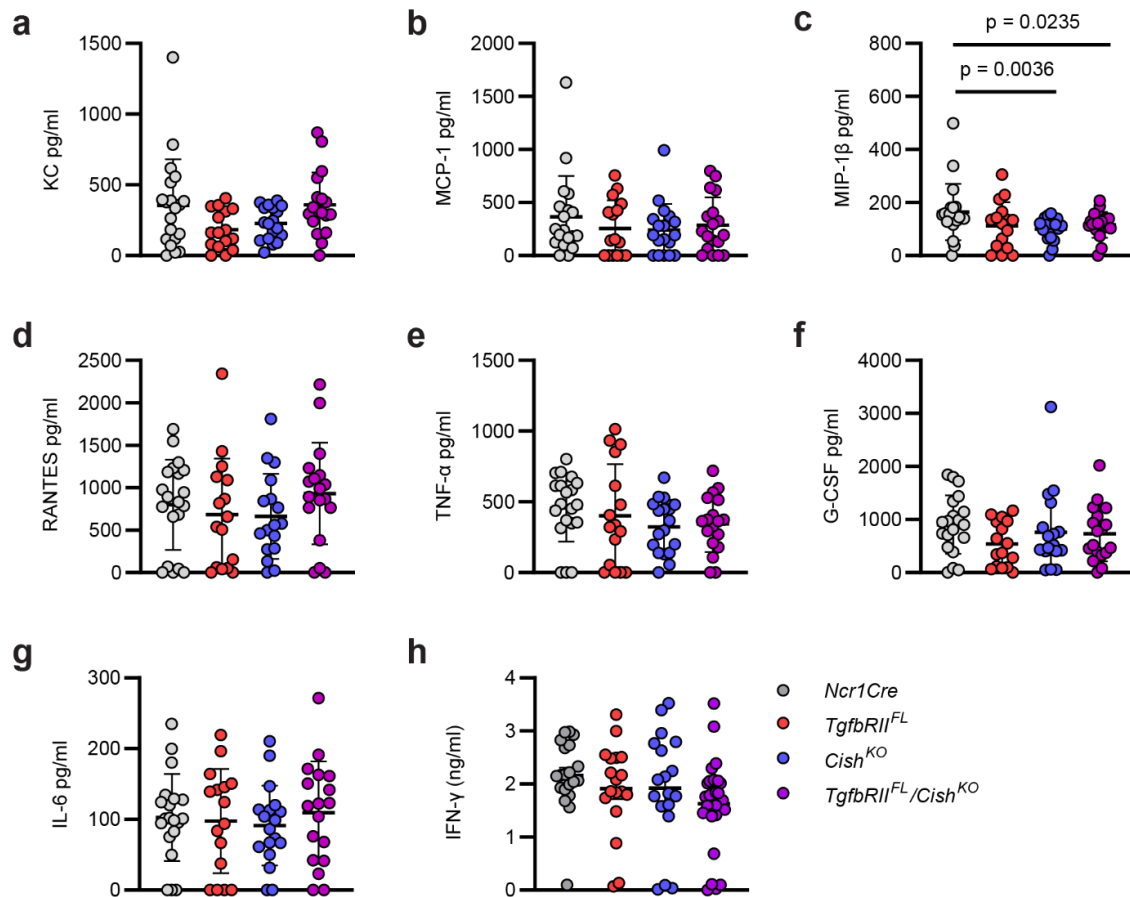

483  
484 **Figure 2 – figure supplement 2: Plasma cytokine levels in transgenic mice at day 9 post**  
485 **infection.** *Ncr1Cre*, *TgfbRII<sup>FL</sup>*, *Cish<sup>KO</sup>*, and *TgfbRII<sup>FL</sup>/Cish<sup>KO</sup>* mice were infected with *S.*  
486 *Typhimurium*. At day 9, plasma was taken to measure cytokine levels by CBA (a-g) or ELISA  
487 (h). Levels of KC (a), MCP-1 (b), MIP-1 $\beta$  (c), RANTES (d), TNF- $\alpha$  (e), G-CSF (f), IL-6 (g),  
488 and IFN- $\gamma$  (h) are shown. Data from two individual experiments. Each symbol represents an  
489 individual mouse, graphs show mean value  $\pm$  SEM. Statistical p values determined by Mann-  
490 Whitney *t* test, where no p value indicates no significant difference.  
491



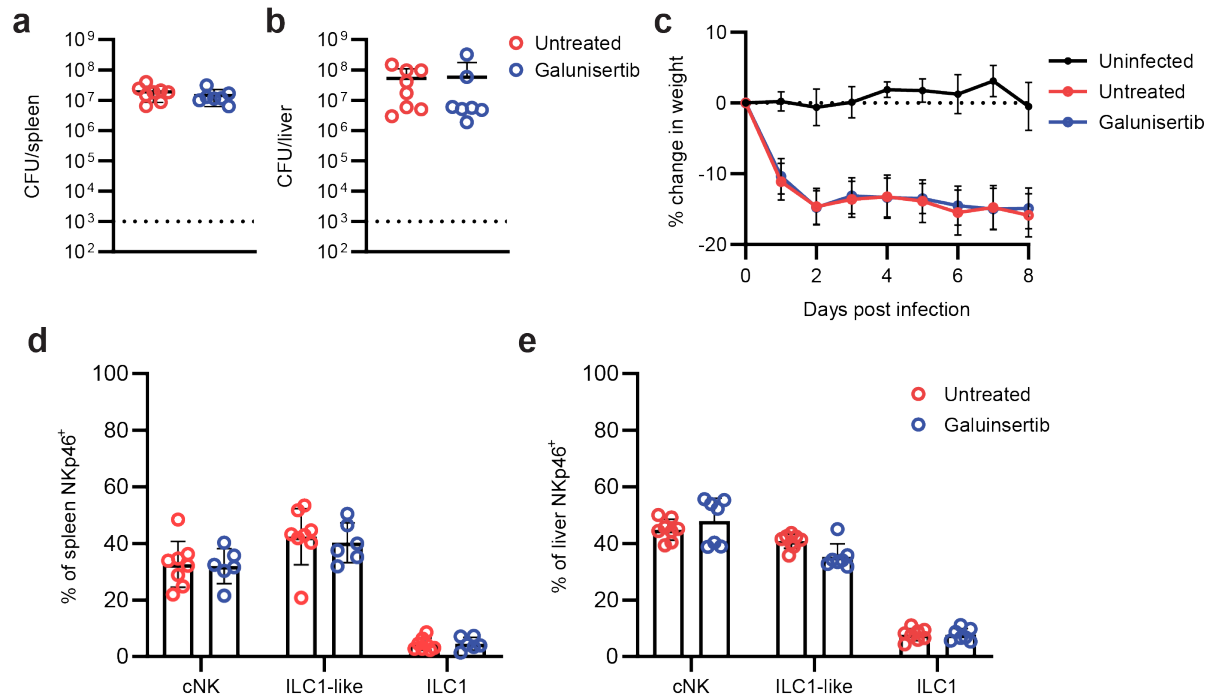

492  
493 **Figure 3 – figure supplement 1: Galunisertib has no effect on *S. Typhimurium* infection.**  
494 C57BL/6 mice were infected with *S. Typhimurium* and treated every second day with the TGF-  
495  $\beta$  antagonist, galunisertib. At day 10, spleens and livers were removed to quantify bacterial  
496 burdens and immune parameters. CFU per spleen (**a**) and liver (**b**) are shown, along with %  
497 change in weight over the course of infection (**c**). Flow cytometry was performed to determine  
498 relative percentages of cNK, ILC1-like, or ILC1 within NKp46<sup>+</sup> cells in the spleen (**d**) and  
499 liver (**e**)(n = 7-8). Data from one experiment. Each symbol represents an individual mouse,  
500 graphs show mean value  $\pm$  SEM. Statistical p values determined by Mann-Whitney *t* test, where  
501 no p value indicates no significant difference.  
502
